# Supplementary material for: Socioeconomic Status and Use of Outpatient Medical Care: The Case of Germany
Source: PubMed Central journal article supplement (PMC4883792; doi:10.1371/journal.pone.0155982), 2016-05-27
Supplement: pone.0155982.s004.pdf [file pone.0155982.s004.pdf]

**S3 Table. Utilization of office-based physicians with different medical specialties by socioeconomic status in men.**

|                             | %    | Modell 1 <sup>a</sup> |         | Modell 2 <sup>b</sup> |         | Modell 3 <sup>c</sup> |         | Modell 4 <sup>d</sup> |         |
|-----------------------------|------|-----------------------|---------|-----------------------|---------|-----------------------|---------|-----------------------|---------|
|                             |      | OR (95% CI)           | p-value | OR (95% CI)           | p-value | OR (95% CI)           | p-value | OR (95% CI)           | p-value |
| <b>Ophthalmology</b>        |      |                       |         |                       |         |                       |         |                       |         |
| Low SES                     | 22.5 | 1.21 (0.90–1.63)      | 0.206   | 1.02 (0.74–1.39)      | 0.906   | 1.01 (0.72–1.41)      | 0.946   | 1.00 (0.72–1.38)      | 0.978   |
| Middle SES                  | 20.5 | 1.06 (0.87–1.29)      | 0.580   | 1.02 (0.83–1.25)      | 0.863   | 1.01 (0.82–1.25)      | 0.911   | 1.00 (0.82–1.23)      | 0.974   |
| High SES                    | 22.1 | 1.00                  |         | 1.00                  |         | 1.00                  |         | 1.00                  |         |
| <b>Surgery/orthopaedics</b> |      |                       |         |                       |         |                       |         |                       |         |
| Low SES                     | 29.2 | 1.32 (1.01–1.73)      | 0.042   | 0.94 (0.70–1.26)      | 0.669   | 0.95 (0.70–1.29)      | 0.743   | 0.94 (0.70–1.27)      | 0.695   |
| Middle SES                  | 30.3 | 1.43 (1.18–1.73)      | 0.000   | 1.21 (0.98–1.50)      | 0.070   | 1.23 (0.99–1.52)      | 0.061   | 1.22 (1.00–1.50)      | 0.055   |
| High SES                    | 24.2 | 1.00                  |         | 1.00                  |         | 1.00                  |         | 1.00                  |         |
| <b>Dermatology</b>          |      |                       |         |                       |         |                       |         |                       |         |
| Low SES                     | 16.6 | 0.64 (0.46–0.89)      | 0.007   | 0.61 (0.43–0.84)      | 0.003   | 0.67 (0.47–0.95)      | 0.024   | 0.67 (0.47–0.95)      | 0.024   |
| Middle SES                  | 16.8 | 0.76 (0.62–0.93)      | 0.008   | 0.74 (0.61–0.91)      | 0.004   | 0.80 (0.65–1.00)      | 0.046   | 0.80 (0.65–1.00)      | 0.052   |
| High SES                    | 23.0 | 1.00                  |         | 1.00                  |         | 1.00                  |         | 1.00                  |         |
| <b>Gynaecology</b>          |      |                       |         |                       |         |                       |         |                       |         |
| Low SES                     | –    |                       |         |                       |         |                       |         |                       |         |
| Middle SES                  | –    |                       |         |                       |         |                       |         |                       |         |
| High SES                    | –    |                       |         |                       |         |                       |         |                       |         |
| <b>Otorhinolaryngology</b>  |      |                       |         |                       |         |                       |         |                       |         |
| Low SES                     | 15.2 | 0.85 (0.61–1.19)      | 0.341   | 0.74 (0.52–1.07)      | 0.108   | 0.79 (0.54–1.15)      | 0.218   | 0.79 (0.56–1.12)      | 0.190   |
| Middle SES                  | 13.6 | 0.87 (0.69–1.08)      | 0.197   | 0.80 (0.64–1.02)      | 0.067   | 0.84 (0.66–1.08)      | 0.179   | 0.84 (0.66–1.09)      | 0.186   |
| High SES                    | 17.7 | 1.00                  |         | 1.00                  |         | 1.00                  |         | 1.00                  |         |
| <b>Internal medicine</b>    |      |                       |         |                       |         |                       |         |                       |         |
| Low SES                     | 16.2 | 0.85 (0.62–1.18)      | 0.333   | 0.55 (0.38–0.79)      | 0.001   | 0.55 (0.37–0.81)      | 0.002   | 0.54 (0.36–0.81)      | 0.003   |
| Middle SES                  | 15.5 | 0.87 (0.68–1.10)      | 0.240   | 0.75 (0.58–0.97)      | 0.032   | 0.75 (0.57–1.00)      | 0.048   | 0.75 (0.54–1.04)      | 0.081   |
| High SES                    | 20.4 | 1.00                  |         | 1.00                  |         | 1.00                  |         | 1.00                  |         |

**S3 Table (continued).**

| <b>Neurology/psychiatry</b>      |      |                  |       |                  |       |                  |       |                  |       |
|----------------------------------|------|------------------|-------|------------------|-------|------------------|-------|------------------|-------|
| Low SES                          | 8.8  | 1.31 (0.79–2.16) | 0.300 | 0.80 (0.48–1.35) | 0.411 | 0.63 (0.37–1.08) | 0.092 | 0.63 (0.37–1.08) | 0.091 |
| Middle SES                       | 5.4  | 1.04 (0.74–1.46) | 0.808 | 0.72 (0.49–1.07) | 0.101 | 0.59 (0.40–0.88) | 0.010 | 0.58 (0.39–0.87) | 0.008 |
| High SES                         | 7.0  | 1.00             |       | 1.00             |       | 1.00             |       | 1.00             |       |
| <b>Psychotherapy<sup>e</sup></b> |      |                  |       |                  |       |                  |       |                  |       |
| Low SES                          | 4.4  | 1.26 (0.67–2.37) | 0.481 | 0.71 (0.32–1.56) | 0.392 | 0.79 (0.34–1.84) | 0.586 | 0.79 (0.35–1.77) | 0.566 |
| Middle SES                       | 2.8  | 0.85 (0.50–1.44) | 0.537 | 0.52 (0.28–0.95) | 0.034 | 0.56 (0.29–1.09) | 0.090 | 0.55 (0.28–1.09) | 0.087 |
| High SES                         | 3.5  | 1.00             |       | 1.00             |       | 1.00             |       | 1.00             |       |
| <b>Radiology</b>                 |      |                  |       |                  |       |                  |       |                  |       |
| Low SES                          | 18.1 | 1.43 (1.00–2.04) | 0.050 | 0.95 (0.64–1.40) | 0.779 | 0.91 (0.61–1.36) | 0.650 | 0.91 (0.63–1.32) | 0.627 |
| Middle SES                       | 15.0 | 1.19 (0.95–1.49) | 0.139 | 0.96 (0.75–1.23) | 0.738 | 0.93 (0.72–1.20) | 0.575 | 0.92 (0.71–1.19) | 0.537 |
| High SES                         | 13.1 | 1.00             |       | 1.00             |       | 1.00             |       | 1.00             |       |
| <b>Urology</b>                   |      |                  |       |                  |       |                  |       |                  |       |
| Low SES                          | 13.2 | 0.90 (0.64–1.28) | 0.568 | 0.80 (0.55–1.16) | 0.230 | 0.76 (0.51–1.14) | 0.185 | 0.76 (0.51–1.14) | 0.183 |
| Middle SES                       | 13.6 | 0.92 (0.72–1.17) | 0.485 | 0.86 (0.66–1.12) | 0.253 | 0.83 (0.62–1.10) | 0.188 | 0.83 (0.64–1.08) | 0.165 |
| High SES                         | 14.7 | 1.00             |       | 1.00             |       | 1.00             |       | 1.00             |       |

%, 12-month prevalence; OR, odds ratio; CI, confidence interval; SES, socioeconomic status.

<sup>a</sup> adjusted for age, age<sup>2</sup>, migration background, municipality size class, residential region.

<sup>b</sup> model 1 plus adjustment for health status (self-rated health, chronic illness, global activity limitations, injury/poisoning, diabetes, coronary heart disease, osteoarthritis, arthritis, cancer, depression, anxiety disorder, asthma, allergic rhinitis, atopic eczema).

<sup>c</sup> model 2 plus adjustment for type of health insurance (statutory, private, other).

<sup>d</sup> model 3 plus adjustment for the regional density of outpatient care (number of family practitioners, specialists, and psychotherapists per 100,000 inhabitants of the district).

<sup>e</sup> incl. psychological psychotherapy.
