# Supplementary material for: Socioeconomic Status and Use of Outpatient Medical Care: The Case of Germany
Source: PubMed Central journal article supplement (PMC4883792; doi:10.1371/journal.pone.0155982), 2016-05-27
Supplement: pone.0155982.s005.pdf [file pone.0155982.s005.pdf]

**S4 Table. Utilization of office-based physicians with different medical specialities by socioeconomic status in women.**

|                             |      | Modell 1 <sup>a</sup> |         | Modell 2 <sup>b</sup> |         | Modell 3 <sup>c</sup> |         | Modell 4 <sup>d</sup> |         |
|-----------------------------|------|-----------------------|---------|-----------------------|---------|-----------------------|---------|-----------------------|---------|
|                             | %    | OR (95% CI)           | p-value | OR (95% CI)           | p-value | OR (95% CI)           | p-value | OR (95% CI)           | p-value |
| <b>Ophthalmology</b>        |      |                       |         |                       |         |                       |         |                       |         |
| Low SES                     | 29,9 | 0,85 (0,64–1,12)      | 0,240   | 0,76 (0,57–1,01)      | 0,062   | 0,82 (0,60–1,11)      | 0,203   | 0,81 (0,61–1,09)      | 0,169   |
| Middle SES                  | 28,3 | 0,86 (0,70–1,06)      | 0,159   | 0,80 (0,65–1,00)      | 0,048   | 0,86 (0,69–1,08)      | 0,198   | 0,86 (0,70–1,05)      | 0,144   |
| High SES                    | 33,2 | 1,00                  |         | 1,00                  |         | 1,00                  |         | 1,00                  |         |
| <b>Surgery/orthopaedics</b> |      |                       |         |                       |         |                       |         |                       |         |
| Low SES                     | 33,1 | 1,39 (1,07–1,82)      | 0,015   | 1,13 (0,85–1,50)      | 0,396   | 1,16 (0,86–1,56)      | 0,331   | 1,16 (0,87–1,55)      | 0,310   |
| Middle SES                  | 32,2 | 1,18 (0,98–1,42)      | 0,076   | 1,09 (0,90–1,33)      | 0,364   | 1,11 (0,91–1,37)      | 0,308   | 1,11 (0,93–1,34)      | 0,239   |
| High SES                    | 26,9 | 1,00                  |         | 1,00                  |         | 1,00                  |         | 1,00                  |         |
| <b>Dermatology</b>          |      |                       |         |                       |         |                       |         |                       |         |
| Low SES                     | 19,9 | 0,70 (0,54–0,92)      | 0,010   | 0,71 (0,53–0,95)      | 0,020   | 0,72 (0,53–0,98)      | 0,034   | 0,72 (0,52–0,99)      | 0,044   |
| Middle SES                  | 21,3 | 0,76 (0,63–0,93)      | 0,006   | 0,76 (0,63–0,93)      | 0,006   | 0,77 (0,63–0,94)      | 0,011   | 0,77 (0,63–0,93)      | 0,008   |
| High SES                    | 27,1 | 1,00                  |         | 1,00                  |         | 1,00                  |         | 1,00                  |         |
| <b>Gynaecology</b>          |      |                       |         |                       |         |                       |         |                       |         |
| Low SES                     | 62,7 | 0,51 (0,39–0,66)      | 0,000   | 0,53 (0,40–0,69)      | 0,000   | 0,51 (0,39–0,68)      | 0,000   | 0,52 (0,39–0,69)      | 0,000   |
| Middle SES                  | 75,0 | 0,78 (0,64–0,96)      | 0,018   | 0,79 (0,64–0,97)      | 0,023   | 0,77 (0,62–0,95)      | 0,015   | 0,77 (0,62–0,97)      | 0,023   |
| High SES                    | 79,9 | 1,00                  |         | 1,00                  |         | 1,00                  |         | 1,00                  |         |
| <b>Otorhinolaryngology</b>  |      |                       |         |                       |         |                       |         |                       |         |
| Low SES                     | 16,0 | 0,83 (0,61–1,14)      | 0,262   | 0,75 (0,55–1,02)      | 0,064   | 0,78 (0,57–1,09)      | 0,145   | 0,79 (0,58–1,09)      | 0,154   |
| Middle SES                  | 18,5 | 0,81 (0,65–1,01)      | 0,061   | 0,78 (0,63–0,97)      | 0,024   | 0,81 (0,64–1,03)      | 0,080   | 0,82 (0,65–1,02)      | 0,078   |
| High SES                    | 22,0 | 1,00                  |         | 1,00                  |         | 1,00                  |         | 1,00                  |         |
| <b>Internal medicine</b>    |      |                       |         |                       |         |                       |         |                       |         |
| Low SES                     | 15,7 | 0,74 (0,54–1,02)      | 0,065   | 0,53 (0,36–0,76)      | 0,001   | 0,51 (0,35–0,75)      | 0,001   | 0,52 (0,36–0,75)      | 0,000   |
| Middle SES                  | 20,0 | 0,96 (0,79–1,16)      | 0,667   | 0,84 (0,68–1,04)      | 0,104   | 0,82 (0,66–1,03)      | 0,082   | 0,83 (0,67–1,03)      | 0,085   |
| High SES                    | 19,5 | 1,00                  |         | 1,00                  |         | 1,00                  |         | 1,00                  |         |

**S4 Table (continued).**

| <b>Neurology/psychiatry</b>      |      |                  |       |                  |       |                  |       |                  |       |
|----------------------------------|------|------------------|-------|------------------|-------|------------------|-------|------------------|-------|
| Low SES                          | 13,3 | 2,53 (1,69–3,79) | 0,000 | 1,66 (1,06–2,57) | 0,025 | 1,50 (0,96–2,35) | 0,077 | 1,51 (0,96–2,36) | 0,075 |
| Middle SES                       | 8,8  | 1,37 (1,00–1,88) | 0,047 | 1,11 (0,78–1,58) | 0,572 | 1,02 (0,71–1,47) | 0,908 | 1,03 (0,72–1,46) | 0,882 |
| High SES                         | 6,9  | 1,00             |       | 1,00             |       | 1,00             |       | 1,00             |       |
| <b>Psychotherapy<sup>e</sup></b> |      |                  |       |                  |       |                  |       |                  |       |
| Low SES                          | 6,3  | 1,14 (0,68–1,92) | 0,615 | 0,68 (0,36–1,29) | 0,239 | 0,61 (0,32–1,14) | 0,118 | 0,58 (0,32–1,07) | 0,081 |
| Middle SES                       | 5,6  | 1,19 (0,79–1,78) | 0,409 | 0,98 (0,63–1,52) | 0,924 | 0,88 (0,57–1,37) | 0,580 | 0,87 (0,60–1,26) | 0,465 |
| High SES                         | 5,9  | 1,00             |       | 1,00             |       | 1,00             |       | 1,00             |       |
| <b>Radiology</b>                 |      |                  |       |                  |       |                  |       |                  |       |
| Low SES                          | 19,6 | 1,11 (0,82–1,51) | 0,482 | 0,89 (0,65–1,22) | 0,469 | 0,92 (0,66–1,28) | 0,614 | 0,94 (0,67–1,31) | 0,702 |
| Middle SES                       | 22,7 | 1,02 (0,83–1,26) | 0,818 | 0,92 (0,74–1,13) | 0,423 | 0,94 (0,74–1,18) | 0,584 | 0,95 (0,76–1,19) | 0,661 |
| High SES                         | 20,7 | 1,00             |       | 1,00             |       | 1,00             |       | 1,00             |       |
| <b>Urology</b>                   |      |                  |       |                  |       |                  |       |                  |       |
| Low SES                          | 6,1  | 1,88 (1,07–3,32) | 0,029 | 1,55 (0,88–2,74) | 0,132 | 1,40 (0,79–2,45) | 0,246 | 1,40 (0,81–2,42) | 0,225 |
| Middle SES                       | 4,4  | 1,08 (0,70–1,67) | 0,716 | 0,99 (0,65–1,53) | 0,972 | 0,90 (0,59–1,39) | 0,648 | 0,91 (0,60–1,38) | 0,646 |
| High SES                         | 3,4  | 1,00             |       | 1,00             |       | 1,00             |       | 1,00             |       |

%, 12-month prevalence; OR, odds ratio; CI, confidence interval; SES, socioeconomic status.

<sup>a</sup> adjusted for age, age<sup>2</sup>, migration background, municipality size class, residential region.

<sup>b</sup> model 1 plus adjustment for health status (self-rated health, chronic illness, global activity limitations, injury/poisoning, diabetes, coronary heart disease, osteoarthritis, arthritis, cancer, depression, anxiety disorder, asthma, allergic rhinitis, atopic eczema).

<sup>c</sup> model 2 plus adjustment for type of health insurance (statutory, private, other).

<sup>d</sup> model 3 plus adjustment for the regional density of outpatient care (number of family practitioners, specialists, and psychotherapists per 100,000 inhabitants of the district).

<sup>e</sup> incl. psychological psychotherapy.
